# Supplementary material
Source: PubMed Central journal article supplement (PMC6760970)

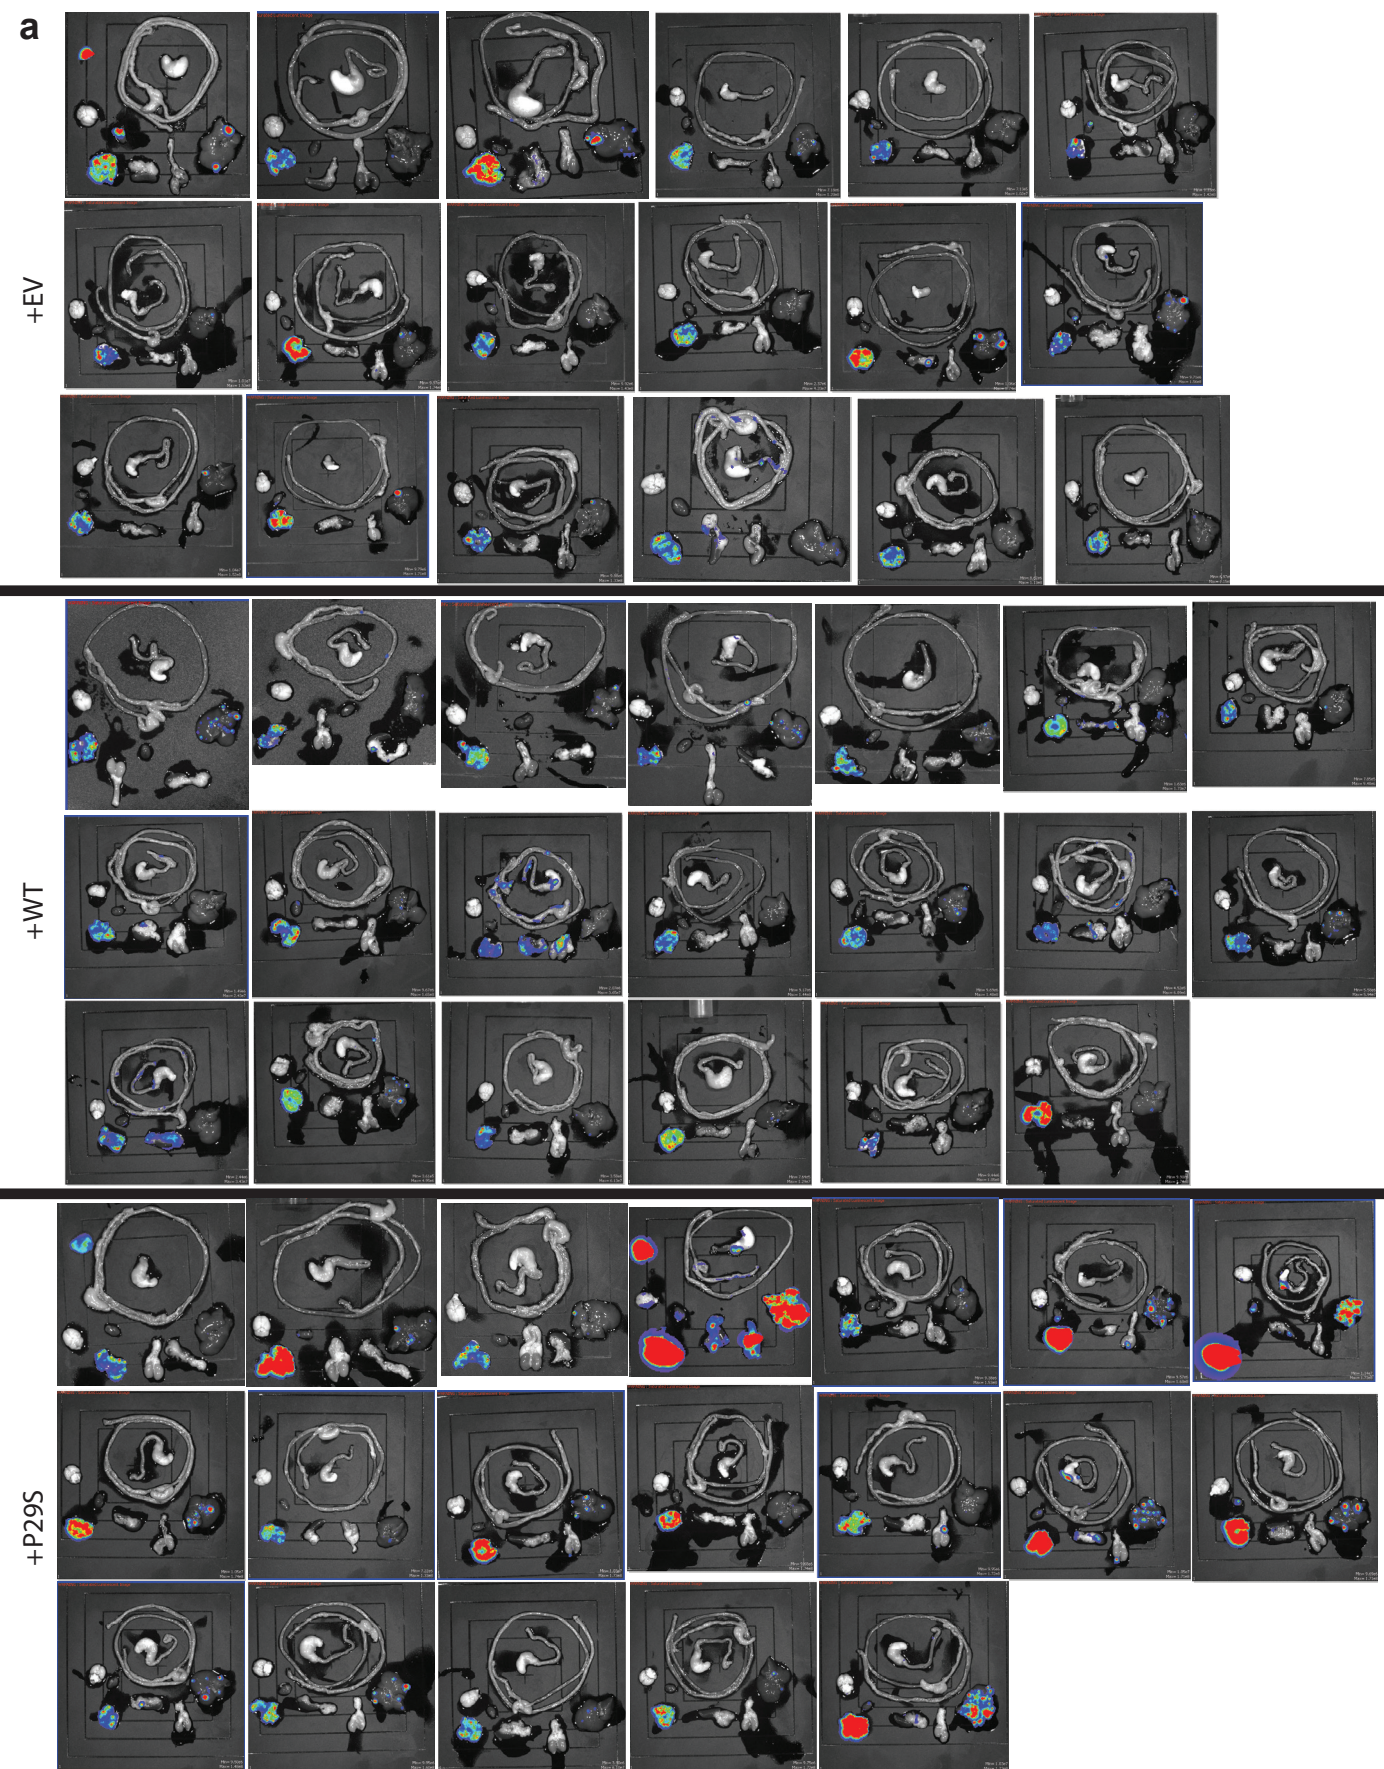

Data S1a.



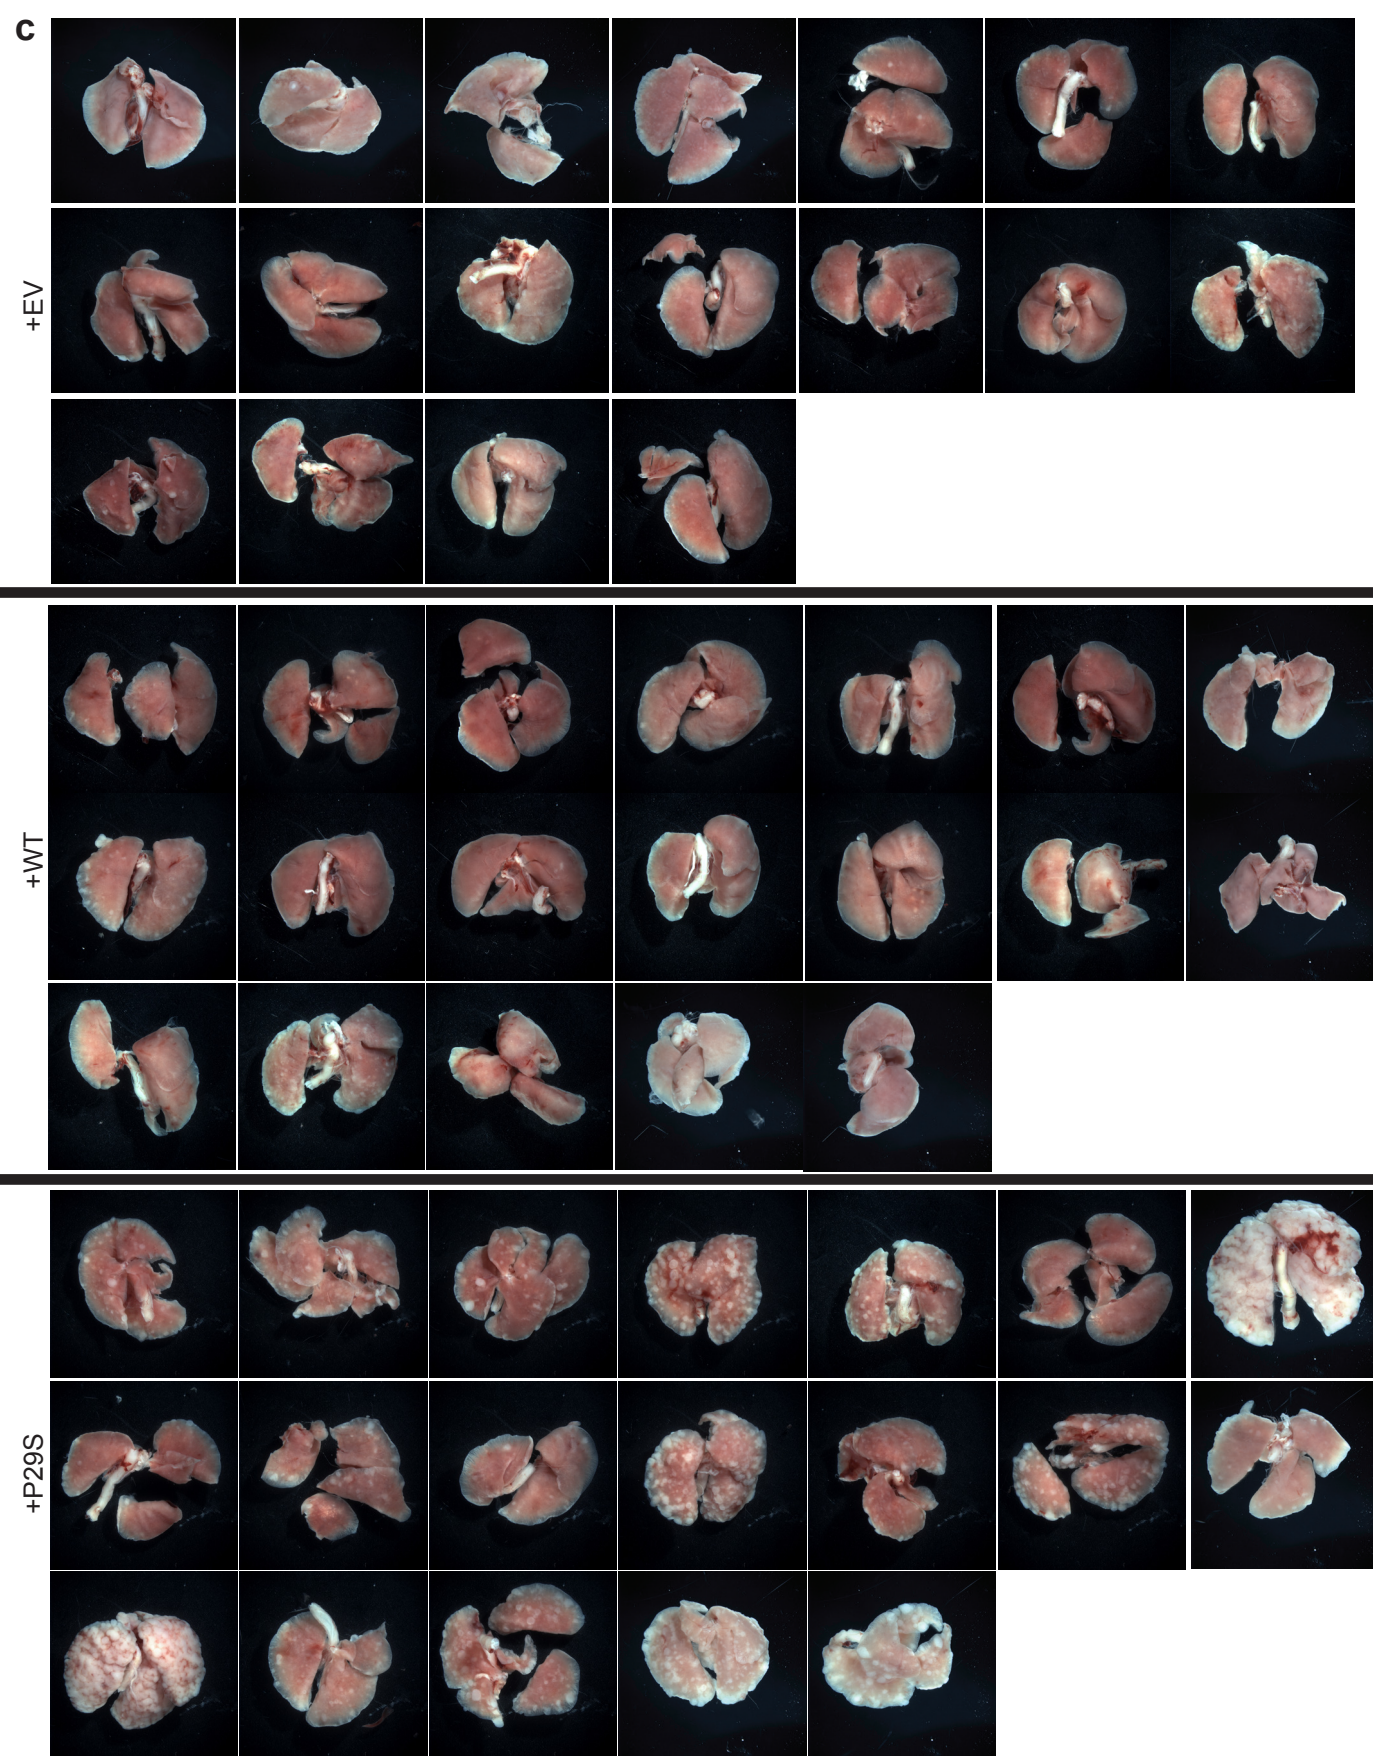

Data S1c.

Supplement: NIHMS1049209-supplement-Supplemental_Data.pdf [file NIHMS1049209-supplement-Supplemental_Data.pdf]
